# Supplementary material
Source: publisher figshare collection journal article supplement (https://wiley.figshare.com/articles/dataset/_/3528515)
Supplement: Supplementary file 1 [file 1]

**David N. Koons, Randall R. Holmes, and James B. Grand. 2007. Population inertia and its sensitivity to changes in vital rates and population structure. *Ecology* 88:2857–2867.**

Appendix B. Proof of Eq. 13 and that the SER elasticities associated with the matrix entries  $a_{ij}$  sum to zero.

*Proof of Eq. 13*

We discuss in detail some technical issues regarding our derivation of the SER sensitivity formula presented in Eq. 13 of the text. To begin, fix a pair  $(i, j)$  and view the matrix  $\mathbf{A}$  as a function of  $t = a_{ij}$  alone (this dependence is indicated by writing  $\mathbf{A} = \mathbf{A}(t)$ ). Let  $I$  be an open interval of real numbers such that  $\mathbf{A}(t)$  is irreducible for all  $t \in I$  and fix  $t_0 \in I$ . We claim that the dominant right  $\mathbf{w}_1$  and left  $\mathbf{v}_1$  eigenvectors of  $\mathbf{A}$  can be chosen in such a way that

(B.1)  $\mathbf{w}_1$  and  $\mathbf{v}_1$  are both differentiable functions of  $t$  on the interval  $I$ ,

(B.2)  $\langle \mathbf{w}_1(t_0), \mathbf{w}_1(t_0) \rangle = 1$ ,

(B.3)  $\langle \mathbf{w}_1', \mathbf{v}_1 \rangle = 0$  and  $\langle \mathbf{w}_1, \mathbf{v}_1' \rangle = 0$ ,

(B.4)  $\langle \mathbf{w}_1, \mathbf{v}_1 \rangle = 1$ .

Here, the prime symbol (') denotes derivative with respect to  $t$  and Eqs. B.3 and B.4 are understood to be identities, that is, valid for all  $t \in I$ . Also, for vectors  $\mathbf{v}$  and  $\mathbf{w}$  we are writing, for clarity,  $\langle \mathbf{v}, \mathbf{w} \rangle$  instead of  $\mathbf{v}^* \mathbf{w}$ . (Reasons for choosing the eigenvectors to satisfy Eqs. B.1 to B.4 are given in the remarks below.)

We first establish a general result.

**Lemma:** Let  $\mathbf{x}$  and  $\mathbf{y}$  be  $n$ -dimensional real vector functions on an open real interval  $I$ . Assume that  $\mathbf{x}$  is differentiable,  $\mathbf{x}'$  and  $\mathbf{y}$  are continuous, and  $\langle \mathbf{x}(t), \mathbf{y}(t) \rangle \neq 0$  for all  $t \in I$ . Let  $c_0$  and  $t_0$  be real numbers with  $t_0 \in I$  and  $c_0 > 0$ . There exists a differentiable positive real-valued function  $c$  on  $I$  such that  $\langle (c\mathbf{x})', \mathbf{y} \rangle = 0$  and  $c(t_0) = c_0$ .

**Proof:** We have  $\langle (c\mathbf{x})', \mathbf{y} \rangle = c' \langle \mathbf{x}, \mathbf{y} \rangle + c \langle \mathbf{x}', \mathbf{y} \rangle$ , so the desired function  $c$  is a solution to the initial value problem  $c' + pc = 0$ ,  $c(t_0) = c_0$ , where  $p = \langle \mathbf{x}', \mathbf{y} \rangle / \langle \mathbf{x}, \mathbf{y} \rangle$ . This has a unique solution, namely  $c(t) = c_0 \exp\left(-\int_{t_0}^t p(u) du\right)$ , which is evidently positive.

For  $t \in I$ , let  $\hat{\mathbf{w}}_1(t)$  and  $\hat{\mathbf{v}}_1(t)$  denote the unique positive right and left eigenvectors of  $\mathbf{A}(t)$  corresponding to  $\lambda_1(t)$  such that  $\langle \hat{\mathbf{w}}_1(t), \hat{\mathbf{w}}_1(t) \rangle = 1$  and  $\langle \hat{\mathbf{v}}_1(t), \hat{\mathbf{v}}_1(t) \rangle = 1$ . This is guaranteed by our assumption that  $\mathbf{A}(t)$  is irreducible for all  $t \in I$ . Then  $\hat{\mathbf{w}}_1$  and  $\hat{\mathbf{v}}_1$  are continuously differentiable vector functions on  $I$ .

Fix  $t_0 \in I$ . Apply the lemma with  $\mathbf{x} = \hat{\mathbf{w}}_1, \mathbf{y} = \hat{\mathbf{v}}_1, c_0 = 1$ . Then  $\mathbf{w}_1 = c\hat{\mathbf{w}}_1$ , with  $c$  as in the lemma, is a differentiable vector function satisfying  $\langle \mathbf{w}'_1, \hat{\mathbf{v}}_1 \rangle = 0$  and  $\mathbf{w}_1(t_0) = \hat{\mathbf{w}}_1(t_0)$ . Apply the lemma again, but this time with  $\mathbf{x} = \hat{\mathbf{v}}_1, \mathbf{y} = \mathbf{w}_1, c_0 = \langle \hat{\mathbf{w}}_1(t_0), \hat{\mathbf{v}}_1(t_0) \rangle^{-1}$ . Then  $\mathbf{v}_1 = c\hat{\mathbf{v}}_1$ , with  $c$  as in the lemma, is a differentiable vector function satisfying  $\langle \mathbf{v}'_1, \mathbf{w}_1 \rangle = 0$  and  $\mathbf{v}_1(t_0) = \langle \hat{\mathbf{w}}_1(t_0), \hat{\mathbf{v}}_1(t_0) \rangle^{-1} \hat{\mathbf{v}}_1(t_0)$ . Note that  $\langle \mathbf{w}'_1, \mathbf{v}_1 \rangle = \langle \mathbf{w}'_1, c\hat{\mathbf{v}}_1 \rangle = c \langle \mathbf{w}'_1, \hat{\mathbf{v}}_1 \rangle = 0$ . Now  $\langle \mathbf{w}_1, \mathbf{v}_1 \rangle' = \langle \mathbf{w}'_1, \mathbf{v}_1 \rangle + \langle \mathbf{w}_1, \mathbf{v}'_1 \rangle = 0$ , so  $\langle \mathbf{w}_1, \mathbf{v}_1 \rangle$  does not depend on  $t$ . Since  $\langle \mathbf{w}_1(t_0), \mathbf{v}_1(t_0) \rangle = \langle \hat{\mathbf{w}}_1(t_0), \langle \hat{\mathbf{w}}_1(t_0), \hat{\mathbf{v}}_1(t_0) \rangle^{-1} \hat{\mathbf{v}}_1(t_0) \rangle = 1$ , it follows that  $\langle \mathbf{w}_1, \mathbf{v}_1 \rangle = 1$  on  $I$ . This establishes the claim that  $\mathbf{w}_1$  and  $\mathbf{v}_1$  can be chosen to satisfy Eqs. B.1 to B.4.

**Remarks:** In view of Eqs. B.1 and B.4, we can use  $\mathbf{w}_1$  and  $\mathbf{v}_1$  in Eq. 8 to view the SER as a differentiable function of  $t$  on the interval  $I$ . Writing the differential  $d\mathbf{w}_1 = \mathbf{w}'_1 dt$  in the form  $d\mathbf{w}_1 = \sum_{m=1}^s a_m \mathbf{w}_m$  as in Caswell (2001:249) and taking the inner product with  $\mathbf{v}_1$  of both sides, we see that  $a_1 = 0$  since  $\langle \mathbf{w}'_1, \mathbf{v}_1 \rangle = 0$  (by Eq. B.3). Therefore, the derivation Caswell gives of the right eigenvector sensitivity formula (Eq. 11 in our paper) is valid for this choice of  $\mathbf{w}_1$  and  $\mathbf{v}_1$  (with the remaining eigenvectors chosen arbitrarily). Since  $\langle \mathbf{w}_1, \mathbf{v}'_1 \rangle = 0$  (by Eq. B.3), the left eigenvector sensitivity formula (Eq. 12) is valid as well. Finally, we point out that if a computer program automatically scales the eigenvectors so that  $\langle \mathbf{w}_1, \mathbf{w}_1 \rangle = 1$  and  $\langle \mathbf{w}_1, \mathbf{v}_1 \rangle = 1$  (as does Matlab), then, in view of Eqs. B.2 and B.4, it gives the desired results when applied to our SER sensitivity formula in Eq. 13 at any fixed parameter value  $a_{ij} = t_0 \in I$ .

*Proof that the SER elasticities associated with the  $a_{ij}$  sum to zero*

We claim that the elasticities of SER relative to the various matrix entries  $a_{ij}$ ,  $1 \leq i, j \leq n$ , all sum to zero (see Eq. 16 in the text). In symbols,

$$\sum_{i,j} \frac{a_{ij}}{\text{SER}} \frac{\partial \text{SER}}{\partial a_{ij}} = 0. \quad (\text{B.5})$$

In order to prove this, we begin with some observations. First,  $\sum_j a_{ij} w_j^{(1)}$  is the  $i$ th entry of  $\mathbf{A}\mathbf{w}_1 = \lambda_1 \mathbf{w}_1$  and is thus equal to  $\lambda_1 w_i^{(1)}$ . Also,  $\sum_i w_i^{(1)} \bar{v}_i^{(m)} = \mathbf{v}_m^* \mathbf{w}_1$ , which is 0 if  $m \neq 1$ . Therefore, using Eq. 11 in the text we get

$$\sum_{i,j} a_{ij} \frac{\partial \mathbf{w}_1}{\partial a_{ij}} = \sum_{i,j} a_{ij} w_j^{(1)} \sum_{m \neq 1} \frac{\bar{v}_i^{(m)}}{\lambda_1 - \lambda_m} \mathbf{w}_m = \sum_{m \neq 1} \frac{\lambda_1}{\lambda_1 - \lambda_m} \left( \sum_i w_i^{(1)} \bar{v}_i^{(m)} \right) \mathbf{w}_m = 0. \quad (\text{B.6})$$

Similarly, using Eq. 12 we get

$$\sum_{i,j} a_{ij} \frac{\partial \mathbf{v}_1^*}{\partial a_{ij}} = 0. \quad (\text{B.7})$$

Now our claim follows from Eq. 10 in the text:

$$\sum_{i,j} \frac{a_{ij}}{\text{SER}} \frac{\partial \text{SER}}{\partial a_{ij}} = \frac{1}{\text{SER}} \frac{1}{\mathbf{e}^T \mathbf{n}_0} \mathbf{e}^T \left[ \left( \mathbf{v}_1^* \mathbf{n}_0 \right) \left( \sum_{i,j} a_{ij} \frac{\partial \mathbf{w}_1}{\partial a_{ij}} \right) + \left( \left( \sum_{i,j} a_{ij} \frac{\partial \mathbf{v}_1^*}{\partial a_{ij}} \right) \mathbf{n}_0 \right) \mathbf{w}_1 \right] = 0. \quad (\text{B.8})$$

We thank an anonymous reviewer for suggesting this property of SER elasticities.

---

[\[Back to E088-177\]](#)
