# Supplementary material
Source: publisher figshare collection journal article supplement (https://wiley.figshare.com/articles/dataset/_/3528515)
Supplement: Supplementary file 2 [file 1 › appendix-B.htm]

Ecological Archives E088-177-A2


### *Ecological Archives* E088-177-A2

### **David N. Koons, Randall R. Holmes, and James B. Grand. 2007. Population inertia and its sensitivity to changes in vital rates and population structure. *Ecology* 88:2857–2867.**

Appendix B. Proof of Eq. 13 and that the SER elasticities associated with the
matrix entries sum to zero. Click here for a PDF file of the appendix.

---


[Back to E088-177]
